# Supplementary material for: Conceptual Ambiguity in Coding the Categories of Peace Agreement and Peace Process
Source: publisher site journal article supplement (doi:10.1515/peps-2020-0003), 2020-12-16
Supplement: Supplementary file 1 [file j_peps-2020-0003_suppl_001.docx]

**Appendix I**

**Comparison of Associating Peace Agreement with Peace Processes in UCDP PA-D version 19.1 and PA-X version 3**

| **Conflict Name** | Peace **Agreement** Name | **date Agreement** | **UCDP PA-D Process No.** | **PA-X Process No.** |
| --- | --- | --- | --- | --- |
| Afghanistan:Government/territory | Afghan Peace Accord and Annex on the Division of Powers ("Islamabad accord") | 1993-03-07 | 1 | 1 |
| Jalalabad accord | 1993-05-20 |
| Mahipar agreement | 1996-05-24 | 2 |
| Peshawar Accord | 1992-04-24 | 105 |
| Kabul Agreement | 2016-09-22 | 104 | 2 |
| Angola: Cabinda | Memorandum of Understanding on Peace and National Reconciliation in Cabinda province | 2006-08-01 | 90 | 137 |
| Angola: Government |  |  | 3 | 4 |
| The Bicesse Agreement | 1991-05-31 |
| The Lusaka Protocol | 1994-11-20 |
| Memorandum of Understanding or Memorandum of Intent | 2002-04-04 |
| Bangladesh: Chittagong Hill Tracts | Chittagong Hill Tracts Peace Accord | 1997-12-02 | 41 | 11 |
| Bosnia and Herzegovina/Yugoslavia (former) | Medjugorje Agreement | 1993-05-18 | 42 | 125 |
| The Washington Agreement | 1994-03-01 |
| Declaration Concerning the Constitution of the Federation of Bosnia and Herzegovina | 1994-03-18 |
| Comprehensive Peace Agreement | 1994-12-20 | 43 |
| Agreed Basic Principles signed on 8 September 1995 at Geneva | 1995-09-08 |
| Further Agreed Basic Principles (additional to those issued 8 September 1995, in Geneva) | 1995-09-08 |
| The General Framework Agreement for Peace in Bosnia and Herzegovina (the Dayton Agreement) | 1995-12-14 |
| The Vance-Owen Plan | 1993-05-02 |
| Burundi: Government | Arusha Peace and Reconciliation Agreement for Burundi | 2000-08-28 | 4 | 16 |
| Ceasefire Agreement between the Transitional Government of Burundi and the Conseil national pour la défense de ladémocratie-Forces pour la défense de la démocratie | 2002-12-02 | 5 |
| Pretoria Protocol on Political, Defence and Security Power Sharing in Burundi | 2003-10-08 |
| The Pretoria Protocol on Outstanding Political, Defence and Security Power Sharing Issues in Burundi | 2003-11-02 |
| Forces Technical Agreement (FTA) between the Transitional Government of the Republic of Burundi and the CNDD-FDD | 2003-11-02 |
| Global Ceasefire agreement between Transitional Government and the Forces pour la defence de la democratie (CNDD-FDD) of Mr. Nkúrunziza | 2003-11-16 |
| Accord de Partage de Pouvoir au Burundi ("Burundi Power-Sharing Agreement") | 2004-08-06 |
| Agreement of Principles Towards Lasting Peace, Security and Stability | 2006-06-18 | 69 |
| Comprehensive Ceasefire Agreement between the Government of Burundi and the Palipehutu-FNL | 2006-09-07 |
| Joint PALIPEHUTU-FNL and Government of the Republic of Burundi Declaration on Cessation of Hostilities | 2008-05-26 |
| Magaliesburg Declaration on the Burundi Peace Process | 2008-06-10 |
| Declaration of the Summit of the Heads of State and Government of the Great Lakes region on the Burundi Peace Process | 2008-12-04 |
| Declaration by the participants to the peace negotiations on Burundi, involving all the parties to the Burundi conflict | 1998-06-21 | 106 |
| Cambodia: Government | The Paris Agreement | 1991-10-23 | 6 | 17 |
| Accord between the Cambodian People's Party (CPP) and the National United Front for an Independent, Neutral, Peaceful and Cooperative Cambodia (FUNCINPEC) | 1991-11-20 |
| Cameroon - Nigeria | The Greentree agreement | 2006-06-12 | 96 | 18 |
| Central African Republic: Government | Syrte Agreement | 2007-02-02 | 70 | 14 |
| Birao Agreement | 2007-04-01 |
| Global Peace Agreement between the Government of the Central African Republic and the APRD, FDPC, and UFDR | 2008-06-21 |
| Ndele Peace Agreement | 2011-06-12 |
| Ceasefire Agreement between UFDR and CPJP under the auspices of the National Mediation Council | 2011-10-08 |
| Acte d’Adhésion de la Convention des Patriotes pour la Justice et la Paix (CPJP) à l’Accord de Paix Global de Libreville | 2012-08-25 |
| Liberville agreements - Declaration of principles to resolve the political and security crisis in the Central African Republic | 2013-01-11 |
| Liberville agreements - Ceasefire | 2013-01-11 |
| Agreement between the Transitional Government and the Armed Groups on the Principles of Disarmament, Demobilization, Reintegration and Repatriation and of Integration into the Uniformed State Forces of the Central African Republic | 2015-05-10 |
| Republican Pact for Peace, National Reconciliation and Reconstruction in the Central African Republic | 2015-05-11 |
| Political Agreement for Peace in the Central African Republic | 2017-06-19 | 108 |
| Chad - Libya | Agreement between the Great Socialist People’s Libyan Arab Jamahiriya and the Republic of Chad concerning the practical modalities for the implementation of the Judgment delivered by the International Court of Justice on 3 February 1994 | 1994-04-04 | 97 | 23 |
| Chad: Government | Tripoli 2 agreement | 2002-01-07 | 15 | 22 |
| Accord de Paix le Gouverment de la Republique du Tchad et les Mouvements Ci-Apres: UFDD, RFC, CNT, UFDDF ("Sirte Agreement") | 2007-10-25 | 109 | 26 |
| Colombia: Government | Acuerdo Gobierno Nacional - Ejécito Popular de Liberacion, Pueblo Nuevo y Juan José | 1990-08-26 | 16 | 97 |
| Acuerdo entre el PCC M-L, EPL, Quintín Lame y PRT y Partidos Políticos Signatarios del Acuerdo Para la Constituyente | 1990-09-24 |
| Acuerdo Gobierno Nacional-EPL y PCC – ML, Labores, Belmira, Antioquia | 1990-09-28 |
| Declaración del Gobierno Nacional y el PCC (ML) y el EPL, Juan José, Córdoba | 1991-01-29 |
| Acuerdo Final Gobierno Nacional-Ejército Popular De Liberación | 1991-02-15 |
| Common Agenda for the Path to a New Colombia | 1999-05-06 | 17 | 99 |
| Metodología y Temática para las Discusiones, Comunicado No. 8, Mesa Nacional de Diálogos y Negociación | 2000-01-28 |
| Los Pozos Agreement | 2001-02-09 |
| San Francisco de la Sombra Accord | 2001-10-05 |
| Agreement for a Timetable for the Future of the Peace Process | 2002-01-20 |
| Joint Communique regarding Comprehensive Rural Reform | 2013-05-26 | 111 | 101 |
| Joint Communiqué # 60 regarding the Agreement of the Creation of a Special Jurisdiction for Peace | 2015-09-23 |
| Agreement on the Victims of Conflict, 'Comprehensive System for Truth, Justice, Reparation and Non-repitition, including the Special Jurisdiction for Peace; and Commitment on Human Rights | 2015-12-15 |
| General Agreement for the Termination of the Conflict and the Construction of a Stable and Lasting Peace | 2012-08-26 | 112 |
| Political participation: opening up democracy to build peace | 2013-11-06 |
| Joint Draft: Towards a new Colombian Countryside: Comprehensive Rural Reform | 2014-06-06 |
| Agreement on the Bilateral and Definitive Ceasefire and Cessation of Hostilities, and the Laydown of Weapons between the National Government and the FARC-EP | 2016-06-23 |
| Acuerdo final para la terminación del conflicto y la construcción de una paz estable y duradera | 2016-11-24 |
| Political Agreement between the National Government, the Political Parties, M-19 and the Catholic Church as Moral and Spiritual Guardian of the Process | 1990-03-09 | 114 | 97 |
| Caracas Agenda | 1991-06-06 | 140 |
| Declaration of Viana | 1998-02-09 | 141 | 98 |
| Comoros: Anjouan | Addis Ababa Agreement | 1997-12-13 | 44 | 15 |
| The Famboni Declaration | 2000-08-26 |
| The Famboni II Agreement | 2001-02-17 |
| Agreement on the transitional arrangements in the Comoros | 2003-12-20 |
| Congo: Government | Agreement on Ending Hostilities in the Republic of Congo | 1999-11-16 | 18 | 92 |
| Ceasefire and ending hostilities agreement between the High Command of the Security Forces and the High Command of the Self-Defence Forces of Resistance | 1999-12-29 |
| Accords de Paix et de cessation des hostilités dans le département de Pool | 2003-03-17 | 116 |
| Croatia: Serb | The Erdut Agreement | 1995-11-12 | 45 | 127 |
| Djibouti - Eritrea | Agreement between the State of Eritrea and the Republic of Djibouti | 2010-06-06 | 99 | 34 |
| Djibouti: Government | Accord de paix et de la reconciliation nationale | 1994-12-26 | 20 | 20 |
| Accord Cadre de Reforme et de Concorde Civile | 2000-02-07 | 21 |
| Accord de reforme et concorde civile | 2001-05-12 |
| DR Congo (Zaire): Government | Lusaka Accord | 1999-08-31 | 19 | 28 |
| Declaration of Fundamental Principles for the Inter-Congolese dialogue | 2001-05-04 |
| Political agreement on consensual management of the transition in the Democratic Republic of the Congo | 2002-04-19 |
| Global and Inclusive Agreement on the Transition in the Democratic Republic of Congo ("Pretoria Agreement") | 2002-12-17 |
| The Constitution of the Transition | 2003-04-01 |
| Inter-Congolese Political Negotiations - The Final Act | 2003-04-02 |
| Peace Agreement between the Government and CNDP (and the Implementation Plan) ("23 March 2009 Agreement") | 2009-03-23 | 74 | 31 |
| Agenda for the Dialogue between the Government of the DRC and the M23 on the situation in Eastern Congo | 2013-01-16 | 117 |
| Ecuador - Peru | Acta Presidencial de Brasilia | 1998-10-26 | 67 | 35 |
| Comprehensive Peru-Ecuadorian Agreement on Border Integration, Development and Neighbourly Relations | 1998-10-26 |
| El Salvador: Government | Geneva Agreement | 1990-04-04 | 22 | 36 |
| General Agenda and Timetable for the Comprehensive Negotiating Process | 1990-05-21 |
| Agreement on Human Rights (San Jose Agreement) | 1990-07-26 |
| Mexico Agreements | 1991-04-27 |
| New York Agreement | 1991-09-25 |
| The Compressed Negotiations | 1991-09-25 |
| New York Act | 1991-12-31 |
| New York Act II | 1992-01-16 |
| The Chapultepec Peace Agreement | 1992-01-16 |
| Acuerdo Complementario del 22 de Diciembre de 1992 | 1992-12-22 |
| Acuerdo Complementario del 5 de Febrero de 1993 | 1993-02-05 |
| Timetable for the Implementation of the Most Important Outstanding Agreements | 1994-05-19 |
| Joint Declaration Signed on 4 October 1994 by the Representatives of the Govt of El Salvador and of the Frente Farabundo Marti para la Liberacion Nacional (FMLN) | 1994-10-04 |
| Eritrea - Ethiopia | Agreement on cessation of hostilities between the Government of the Federal Democratic Republic of Ethiopia and the Government of the State of Eritrea | 2000-06-18 | 66 | 37 |
| Agreement between the Government of the State of Eritrea and the Government of the Federal Democratic Republic of Ethiopia (Algiers accord) | 2000-12-12 |
| Joint Declaration of Peace and Friendship between Eritrea and Ethiopia | 2018-07-09 |
| Agreement on Peace, Friendship and Comprehensive Cooperation between Eritrea and Ethiopia | 2018-09-16 |
| Ethiopia: Ogaden | Joint Declaration Between the Federal Democratic Republic of Ethiopia And The Ogaden National Liberation Front | 2018-10-21 | 142 | 40 |
| Georgia: Abkhazia | Final Document of the Moscow Meeting (Moscow Ceasefire) | 1992-09-03 | 46 | 43 |
| Memorandum of understanding between the Georgian and Abkhaz sides at the negotiations held in Geneva | 1993-12-01 |
| Communiqué on the second round of negotiations between the Georgian and Abkhaz sides | 1994-01-13 |
| Declaration on measures for a political settlement of the Georgian/Abkhaz conflict | 1994-04-04 |
| Guatemala: Government | The Oslo Accord | 1990-03-30 | 23 | 45 |
| The Mexico Accord | 1991-04-26 |
| The Querétaro Agreement | 1991-07-25 |
| The Framework Agreement for the Resumption of Negotiations between the Government of Guatemala and the Guatemalan National Revolutionary Unity | 1994-01-10 |
| The Agreement on a Timetable for Negotiations on a Firm and Lasting Peace in Guatemala | 1994-03-29 |
| The Comprehensive Agreement on Human Rights | 1994-03-29 |
| The Agreement on the Resettlement of Population Groups Uprooted by the Armed Conflict | 1994-06-17 |
| The Agreement for the Establishment of the Commission to Clarify Past Human Rights Violations and Acts of Violence that have Caused the Guatemalan Population to Suffer | 1994-06-23 |
| The Agreement on the Identity and Rights of Indigenous Peoples | 1995-03-31 |
| The Agreement on Socio-economic Aspects and the Agrarian Situation | 1996-05-06 |
| The Agreement on the Strengthening of Civilian Power and the Role of the Armed Forces in a Democratic Society | 1996-09-19 |
| The Agreement on a Definitive Ceasefire | 1996-12-04 |
| The Agreement on Constitutional Reforms and the Electoral Regime | 1996-12-07 |
| The Agreement on the Basis for the Legal Integration of the URNG | 1996-12-12 |
| The Agreement for a Firm and Lasting Peace | 1996-12-29 |
| The Agreement on the Implementation, Compliance and Verification Timetable for the Peace Agreements | 1996-12-29 |
| Guinea-Bissau: Government | Abuja Peace Agreement | 1998-11-01 | 24 | 46 |
| Additional Protocol to the Abuja Accord of 1 November 1998 Concerning the Formation of the Government of National Unity of Guinea-Bissau | 1998-12-15 |
| Haiti: Government | The Governors Island agreement | 1993-07-03 | 25 | 48 |
| India - Pakistan | Lahore Declaration | 1999-02-21 | 119 | 53 |
| Memorandum of Understanding between the Governments of India and Pakistan | 1999-02-21 |
| India: Bodoland | Memorandum of settlement and Bodoland Autonomous Council Act, 1993 | 1993-02-20 | 47 | 50 |
| India: Tripura | Memorandum of Settlement - 23 August 1993 | 1993-08-23 | 48 | 54 |
| Indonesia: Aceh | Points for Further Consultation | 2002-02-03 | 49 | 55 |
| Cessation of Hostilities Framework Agreement | 2002-12-09 |
| Memorandum of Understanding between the Government of the Republic of Indonesia and the Free Aceh Movement | 2005-08-15 |
| Israel: Palestine | Declaration of Principles on Interim Self-Government Arrangements/ Oslo Agreement | 1993-09-13 | 50 | 63 |
| Agreement on the Gaza Strip and the Jericho Area | 1994-05-04 |
| Agreement on Preparatory Transfer of Powers and Responsibilities Between Israel and the PLO | 1994-08-29 |
| Protocol on Further Transfer of Powers and Responsibilities | 1995-08-27 |
| Israeli-Palestinian Interim Agreement on the West Bank and the Gaza Strip ("Oslo II") | 1995-09-28 | 51 |
| Protocol on Redeployment in Hebron | 1997-01-15 |
| The Wye River Memorandum | 1998-10-23 | 52 |
| The Sharm el-Sheik Memorandum Wye II | 1999-09-04 |
| Israeli-Palestinian Joint Understanding on Negotiations ("Annapolis Conference Joint Understanding on Negotiations") | 2007-11-27 | 92 |
| Ivory Coast: Government | Linas-Marcoussis Peace Accords | 2003-01-25 | 26 | 5 |
| Accra II | 2003-03-07 |
| Accra III | 2004-07-30 |
| Pretoria Agreement on the Peace Process in Côte dIvoire | 2005-04-06 |
| Declaration on the Implementation of the Pretoria Agreement on the Peace Process in the Côte d'Ivoire ('Pretoria II') | 2005-06-29 |
| Ouagadougou Political Agreement | 2007-03-04 | 75 |
| First Complementary Agreement to the Ouagadougou Political Agreement | 2007-03-27 |
| Second Complementary Agreement to the Ouagadougou Political Agreement | 2007-11-28 |
| Third Complementary Agreement to the Ouagadougou Political Agreement | 2007-11-28 |
| Fourth Complementary Agreement to the Ouagadougou Political Agreement | 2008-12-22 |
| Liberia: Government | Banjul III Agreement | 1990-10-24 | 27 | 69 |
| Bamako Ceasefire Agreement | 1990-11-28 | 28 |
| Banjul IV Agreement | 1990-12-21 |
| Lomé Agreement | 1991-02-13 |
| The Final Communique of the Fourth Meeting of the Committee of Five of the Economic Community of West African States of the Liberian Crisis, held in Yamoussoukro IV on the 29 and 30 October 1991 (Yamoussoukro IV Peace Agreement) | 1991-10-30 | 29 |
| Final Communiqué of the ECOWAS Committee of Five on Liberia ("Geneva Agreement") | 1992-04-07 |
| Cotonou Peace Agreement | 1993-07-25 |
| Akosombo Peace Agreement | 1994-09-12 |
| Agreement on the clarification of the Akosombo Agreement | 1994-12-21 |
| Abuja Agreement to Supplement the Cotonou and Akosombo, Agreements as subsequently clarified by the Accra Agreement ("Abuja Peace Agreement") | 1995-08-19 |
| Supplement to the Abuja Accord ("Abuja II Peace Agreement") | 1996-08-17 |
| Agreement on Ceasefire and Cessation of Hostilities Between the Government of the Republic of Liberia and Liberians United for Reconciliation and Democracy and the Movement for Democracy in Liberia ("Accra Ceasefire Agreement") | 2003-06-17 | 30 |
| Comprehensive Peace Agreement Between the Government of Liberia and the Liberians United for Reconciliation and Democracy (LURD) and the Movement for Democracy in Liberia (MODEL) and Political Parties ("Accra Peace Agreement") | 2003-08-18 |
| Macedonia, FYR: Government | The Ohrid Agreement | 2001-08-13 | 31 | 131 |
| Mali: Azawad | Tamanrasset Accord | 1991-01-06 | 54 | 74 |
| Mopti Accord | 1991-12-18 |
| Pacte National | 1992-04-11 |
| Summary of Conclusions of the Preparatory Consultations for Implementation of the Agreement for Peace and Reconciliation in Mali stemming from the Algiers Process | 2015-06-05 | 103 |
| Preliminary agreement for the presidential election and inclusive peace negotiations in Mali ("Ouagadougou Preliminary Agreement") | 2013-06-18 | 121 |
| Accord for peace and reconciliation in Mali emanating from the Algiers process | 2015-06-20 | 122 |
| Mexico: Government | The San Andrés Accords | 1996-02-16 | 32 | 75 |
| Joint Declaration that the Federal Government and the Ezln Shall Submit to National Debating and Decision-Making Bodies | 1996-02-16 |
| Joint Proposals That the Federal Government and the EZLN Agree to Remit to the National Debating and Decision-Making Bodies in Accordance with Paragraph 1.4 of the Rules of Procedure | 1996-02-16 |
| Commitments for Chiapas by the State and Federal Governments and the EZLN under Paragraph 1,3 of the Rules of Procedure | 1996-02-16 |
| Actions and Measures for the Chiapas Joint Commitments and Proposals From the State and Federal Governments, and the EZLN | 1996-02-16 |
| Protocol on the negotiating principles for the peace agreement concluded between the Government and the Zapatista National Liberation Army (Ejército zapatista de liberación nacional, EZLN) | 1995-09-11 | 123 |
| Moldova: Dniestr | Memorandum on the Basis for Normalization of Relations between the Republic of Moldova and Transdniestria | 1997-05-08 | 55 | 76 |
| Mozambique: Government | The Protocol on the Agreed Agenda | 1991-05-28 | 33 | 78 |
| Basic Principles | 1991-10-18 |
| Agreement on Establishment and Recognition of Political Parties | 1991-11-13 |
| Agreement on Principles of the Electoral Act | 1992-03-12 |
| Joint Declaration on the Conclusion of the Peace Process | 1992-08-07 |
| The Acordo Geral de Paz (AGP) | 1992-10-04 |
| Myanmar (Burma): Karen | Kalo Htoo Baw (DKBA-5) Government Union Level peace agreement | 2011-12-11 | 126 | 80 |
| Myanmar (Burma): Karen, Myanmar (Burma): Shan | Deed of Commitment for Peace and National Reconciliation | 2015-02-12 |
| Myanmar (Burma): Mon | Nationwide Ceasefire Agreement (LDU and NMSP) | 2018-02-13 | 125 |
| Myanmar (Burma): Karen, Myanmar (Burma): Government, Myanmar (Burma): Shan | Nationwide Ceasefire Agreement (NCA) | 2015-10-15 |
| Myanmar (Burma): Wa | UWSA Government 6-point Union-level Peace Agreement | 2012-12-26 | 124 |
| Nepal: Government | Ceasefire Code of Conduct | 2006-05-25 | 77 | 81 |
| The Eight-point SPA-Maoist Agreement | 2006-06-16 |
| Decisions of the Summit Meeting of the Seven-Party Alliance and the Communist Party of Nepal (Maoist) | 2006-11-08 |
| Comprehensive Peace Agreement, 2006 | 2006-11-21 |
| The Seven Point Agreement | 2011-11-01 |
| Nicaragua: Government | Managua Protocol on Disarmament | 1990-05-30 | 127 | 29 |
| Niger: Air and Azawad | Ouagadougou Accord | 1994-10-09 | 56 | 83 |
| Agreement establishing permanent peace between the government of Niger and ORA | 1995-04-15 |
| Niger: Government | Paris Accord | 1993-06-10 |
| Protocole d'accord additionnel entre le Gouvernement de la Republique du Niger et l'Union des Forces de la Resistance Armee (FPLS, MUR, FAR) et les Forces Armees Revolutionnaires du Sahara | 1997-11-23 | 128 |
| Papua New Guinea: Bougainville | Endeavour accord on dialogue and return of services to Bougainville | 1990-08-05 | 57 | 9 |
| The Honiara Declaration | 1991-01-23 |
| Honiara Commitments to Peace | 1994-09-03 |
| Lincoln Agreement on Peace, Security and Development on Bougainville | 1998-01-23 |
| Fundamental Principles for the Future of Bougainville (The Hutjena Minute) | 1999-06-30 |
| The Hutjena Record | 1999-12-15 |
| Loloata Understanding | 2000-03-23 |
| Gateway Communique | 2000-06-09 |
| Bougainville Peace Agreement | 2001-08-30 | 58 |
| Philippines: Government | GRP-RAM/SFP/YOU General Agreement for Peace | 1995-10-13 | 34 | 91 |
| Philippines: Mindanao | Final agreement on the implementation of the 1976 Tripoli Agreement between the Government of the Republic of the Philippines (GRP) and the Moro National Liberation Front (MNLF) | 1996-09-02 | 59 | 90 |
| Agreement on Peace between the government of the Republic of the Philippines and the Moro Islamic Liberation Front | 2001-06-22 |
| Consensus Points on the Strands on Concept, Territory Resources, and Governance at TWG level | 2005-04-20 |
| Joint Statement: Joint GRP-MILF- Technical Working Groups on Goverance of the Ancestral Domain Aspect of the Agreement of Peace of 2001 | 2006-02-06 |
| Joint Statement (Joint Meeting of the GRP and MILF Technical Working Groups on Resources) | 2006-02-07 |
| Joint Statement | 2006-02-07 |
| Government of the Philippines-MILF Decision Points on Principles as of April 2012 | 2012-04-24 |
| Framework Agreement on the Bangsamoro | 2012-10-15 |
| Annex on Transitional Arrangements and Modalities to the Framework Agreement on the Bangsamoro (FAB) | 2013-02-27 |
| Annex on Revenue Generation and Wealth-sharing to the Framework Agreement on the Bangsamoro (FAB) | 2013-07-13 |
| Annex on Power-Sharing to the Framework Agreement on the Bangsamoro (FAB) | 2013-12-08 |
| Annex on Normalization | 2014-01-25 |
| Addendum on the Bangsamoro Waters and Zones of Joint Cooperation | 2014-01-25 |
| Comprehensive Agreement on the Bangsamoro | 2014-03-27 |
| Statement of Understanding (Cipanas Understanding) | 1993-04-16 | 129 |
| Rwanda: Government | N’sele Cease-fire Agreement | 1991-03-29 | 35 | 47 |
| The Protocol of Agreement between the Government of the Republic of Rwanda and the Rwandese Patriotic Front on the Rule of Law | 1992-08-18 |
| Protocol of Agreement on Power-sharing within the Framework of broad-based Transitional Government between the Government of the Republic of Rwanda and the Rwandese Patriotic Front | 1992-10-30 |
| The Protocols of Agreement between the Government of the Republic of Rwanda and the Rwandese Patriotic Front on Power-Sharing within the Framework of a Broad-Based Transitional Government | 1993-01-09 |
| The Protocol of Agreement between the Government of the Republic of Rwanda and the Rwandese Patriotic Front on the Repatriation of Refugees and the Resettlement of Displaced Persons | 1993-06-09 |
| The Protocol Agreement between the Government of the Republic of Rwanda and the Rwandese Patriotic Front on the integration of Armed Forces of the two parties | 1993-08-03 |
| The Protocol of Agreement between the Government of the Republic of Rwanda and the Rwandese Patriotic Front on Miscellaneous Issues and Final Provisions | 1993-08-03 |
| Arusha Accords | 1993-08-04 |
| Senegal: Casamance | Accord general de paix entre le gouvernement de la republique du Senegal el le Mouvement des forces democratique de la Casamace (MFDC) | 2004-12-30 | 60 | 61 |
| Serbia (Yugoslavia): Slovenia | Brioni Agreement | 1991-07-12 | 65 | 126 |
| Sierra Leone: Government | Abidjan Peace Agreement | 1996-11-30 | 36 | 71 |
| Lomé Peace Agreement | 1999-07-07 | 37 |
| Abuja Ceasefire Agreement | 2000-11-10 |
| Somalia: Government | Addis Ababa Agreement | 1993-03-27 | 38 | 87 |
| Nairobi Declaration on National Reconciliation | 1994-03-24 |
| The Cairo Declaration on Somalia | 1997-12-22 |
| Djibouti Agreement | 2008-08-19 | 78 | 87 |
| Decision of the High Level Committee, Djibouti Agreement | 2008-11-26 |
| Joint Declaration between the Transitional Federal Government and the Alliance for the Re-Liberation of Somalia | 2008-10-26 | 131 |
| South Africa: Government | Groote Schuur Minute | 1990-05-04 | 79 | 23 |
| Pretoria Minute | 1990-08-06 |
| CODESA Declaration of Intent | 1991-12-20 |
| Record of Understanding | 1992-09-26 |
| Interim Constitution | 1993-11-18 |
| South Sudan - Sudan | Addis Ababa Agreement on Cooperation | 2012-09-27 | 130 | 110 |
| Addis Ababa Agreement on Border Issues | 2012-09-27 |
| Addis Ababa Agreement on Security Arrangements | 2012-09-27 |
| Adoption of the Implementaiton Matrix by the Sudan and South Sudan | 2013-03-12 |
| South Sudan: Government | Agreement on the Resolution of the Conflict in Jonglei state | 2014-05-09 | 132 | 151 |
| Agreement between the Government of the Republic of South Sudan (GRSS) and the South Sudan Democratic Movement/Army (SSDM/A) | 2012-02-27 | 107 |
| Agreement to Resolve the Crisis in South Sudan | 2014-05-09 |
| Agreement on the Reunification of the SPLM | 2015-01-21 |
| Agreement on the Establishment of the Transitional Government of National Unity | 2015-02-01 |
| Agreement on the Resolution of the Conflict in the Republic of South Sudan | 2015-08-17 |
| South Sudan: Government | Revitalised agreement on the resolution of the conflict in the Republic of South Sudan (R-ARCSS) | 2018-09-12 |
| South Yemen - Yemen (North Yemen) | Agreement Establishing a Union between the State of the Yemen Arab Republic and the State of the People's Democratic Republic of Yemen | 1990-04-22 | 101 | 122 |
| Sudan: Government | Machakos Protocol | 2002-07-20 | 62 | 109 |
| Agreement on Security Arrangements During the Interim Period | 2003-09-25 |
| Framework on Wealth Sharing During the Pre-Interim and Interim Period | 2004-01-07 |
| Protocol Between the GOS and SPLM on Power Sharing | 2004-05-26 |
| The Protocol Between the GOS and SPLM on the Resolution of Conflict in Abyei Area | 2004-05-26 |
| The Protocol Between the GOS and SPLM on the Resolution of Conflict in Southern Kordofan/Nuba Mountains and Blue Nile States | 2004-05-26 |
| Nairobi Declaration on the Final Phase of Peace in the Sudan | 2004-06-05 |
| Declaration on the Conclusion of the IGAD Negotiations on Peace in the Sudan | 2004-11-19 |
| Agreement Between the Government of the Sudan (GOS) and the Sudan People’s Liberation Movement/Sudan People’s Liberation Army (SPLM/SPLA) on Implementation Modalities of the Protocols and Agreements | 2004-12-31 |
| The Implementation Modalities of the Protocol on Power Sharing, dated 26th May, 2004 | 2004-12-31 |
| The Implementation Modalities of the Protocol on the Resolution of the Abyei Conflict, dated 26th May, 2004 | 2004-12-31 |
| The Implementation Modalities for the Protocol on the Resolution of Conflict in Southern Kordofan and Blue Nile States, dated 26th May, 2004 | 2004-12-31 |
| Sudan Comprehensive Peace Agreement | 2005-01-09 |
| Memorandum of Understanding on Cessation of Hostilities between the Government of the Sudan and the Sudan People´s Liberation Movement/Army | 2002-10-15 | 136 |
| Memorandum of Understanding between the Government of the Sudan and the Sudan People´s Liberation Movement/Army on Aspects of Structures of Government | 2002-11-18 |
| Cairo Framework Agreement between the GoS and the NDA | 2005-01-16 | 81 |
| Agreement between the GoS and the NDA (Cairo Agreement) | 2005-06-18 |
| Darfur Peace Agreement | 2006-05-05 | 82 | 21 |
| Doha Agreement | 2010-02-23 | 83 |
| Addis Ababa Agreement (Framework Agreement between the Government of Sudan and the Sudan People´s Liberation Movement (North) on Political Partnership between NCP and SPLMN, and Political and Security Arrangements in Blue Nile and Southern Kordofan States) | 2011-06-28 | 84 |
| Declaration of Principles for the Resolution of the Sudanese Conflict in Darfur | 2005-07-05 | 106 |
| Agreement on the National Dialogue and Constitutional Process | 2014-09-04 | 133 |
| Roadmap Agreement | 2016-08-08 | 135 |
| Tajikistan: Government | Protocol on the Fundamental Principles of Establishing Peace and National Accord in Tajikistan | 1995-08-17 | 39 | 116 |
| Agreement between the President of the Republic of Tajikistan, E.S. Rakhmonov, and the leader of the United Tajik-Opposition, S.A. Huri, on the results of the meeting held in Moscow 23 December 1996 | 1996-12-23 |
| Protocol on the main functions and powers of the Commission on National Reconciliation | 1996-12-23 |
| Tehran Joint statement | 1997-01-19 |
| Statute of the Commission on National Reconciliation | 1997-02-21 |
| Protocol on military issues | 1997-03-08 |
| Protocol on political issues | 1997-05-18 |
| Protocol on the guarantees of implementation of the General Agreement on Establishment of Peace and National Accord in Tajikistan | 1997-05-28 |
| The Moscow Declaration - General agreement on the Establishment of Peace and National Accord in Tajikistan | 1997-06-27 |
| Uganda: Government | Yumbe Peace Agreement | 2002-12-24 | 40 | 120 |
| Agreement on Comprehensive Solutions between the Government of the Republic of Uganda and Lord’s Resistance Army/Movement | 2007-05-02 | 87 |
| Agreement on Accountability and Reconciliation between the Government of the Republic of Uganda and the Lords Resistance Army/Movement | 2007-06-29 |
| Annex to the accountability and reconciliation protocol | 2008-02-19 |
| Implementation protocol to the Agreement on Comprehensive Solutions | 2008-02-22 |
| Agreement on a Permanent ceasefire | 2008-02-23 |
| Agreement on Disarmament, Demobilisation and Reintegration | 2008-02-28 |
| Agreement on Implementation and Monitoring Mechanisms | 2008-02-29 |
| Ukraine: Donetsk | Protocol on the results of consultations of the Trilateral Contact Group with respect to the joint steps aimed at the implementation of the Peace Plan of the President of Ukraine, P. Poroshenko,and the initiatives of the President of Russia, V. Putin | 2014-09-05 | 138 | 121 |
| Ukraine: Novorossiya | Package of measures for the Implementation of the Minsk agreements | 2015-02-12 |
| United Kingdom: Northern Ireland | The Good Friday Agreement | 1998-04-10 | 63 | 62 |
| Yemen (North Yemen): Government | The Peace and National Partnership Agreement | 2014-09-21 | 139 | 123 |
