# Supplementary material for: Conceptual Ambiguity in Coding the Categories of Peace Agreement and Peace Process
Source: publisher site journal article supplement (doi:10.1515/peps-2020-0003), 2020-12-16
Supplement: Supplementary file 2 [file j_peps-2020-0003_suppl_002.docx]

**Appendix II**

The 30 conflicts in which peace agreements are associated differently with peace processes in UCDP PA-D compared to PA-X are:

1)Afghanistan: government/territory; 2)Bosnia and Herzegovina/Yugoslavia (former); 3)Burundi: government; 4)Central African Republic: government; 5)Colombia: government (partly); 6)Congo: government; 7)Croatia: Serb; 8)Djibouti – Eritrea; 9)Djibouti: government; 10)DR Congo (Zaire): government; 11)Israel: Palestine; 12)Ivory Coast: government; 13)Liberia: government; 14)Mali: Azawad; 15)Mexico: government; 16) Myanmar: Karen; 17) Myanmar: Shan; 18)Myanmar: Mon; 19)Myanmar: government; 20) Myanmar: Shan; 21)Myanmar:Wa; 22)Niger: Air and Azawad; 23)Niger: government; 24)Papua New Guinea: Bougainville; 25)Philippines: Mindanao; 26)Sierra Leone: government; 27)Somalia: government; 28)South Sudan: government; 29)Sudan: government; 30)Uganda: government;

The 33 conflicts in which peace agreements are associated similarly with peace processes in UCDP PA-D compared to PA-X are:

1)Angola: Cabinda; 2) Angola: government; 3) Bangladesh: Chittagong Hill Tracts; 4) Colombia: government (partly); 5) Comoros: Anjouan; 6) Ecuador – Peru; 7) El Salvador: government; 8) Eritrea – Ethiopia; 9) Ethiopia: Ogaden; 10)Georgia: Abkhazia; 11) Guatemala: government; 12) Guinea-Bissau: government; 13)Haiti: government: 14) India- Pakistan; 15) India: Bodoland; 16) India: Tripura; 17) Indonesia: Aceh; 18) Macedonia, FYR: government; 19) Moldova: Dniestr; 20) Mozambique: government; 21) Nepal: Government; 22) Nicaragua: government; 23) Philippines: government; 24) Rwanda: government; 25) Senegal: Casamance; 26) Serbia (Yugoslavia): Slovenia; 27) South Africa: government; 28) South Sudan - Sudan; 29) South Yemen - Yemen (North Yemen); 30) Tajikistan: government; 31) Ukraine: Donetsk; Ukraine: Novorossiya; 32) United Kingdom: Northern Ireland; 33) Yemen (North Yemen): government.
